# Supplementary material for: Challenges in Laboratory Diagnosis of Malaria in a Low-Resource Country at Tertiary Care in Eastern Nepal: A Comparative Study of Conventional vs. Molecular Methodologies
Source: Hindawi journal article supplement (doi:10.1155/2021/3811318), 2021-12-28

Molecular Biology Laboratory  
BP Koirala Institute of Health Science  
RGQ Machine Nr RGQ\_01  
qPCR Experiment No: Q199  
Date : 26/07/2018  
PCR Name Malaria 5 qPCR  
SOP No. MLB\_BP\_0062\_1.1

1. To perform the Malaria multiplex PCR of clinical sample  
2. Required Material:

| SN                       | Chemical /Reagents  | Brand       | Catalogue Number | Lot Number |
|--------------------------|---------------------|-------------|------------------|------------|
| 1                        | PCR grade water     | Himedia     | ML024            | 0000117943 |
| 2                        | Primer/Probe Mix    | AIT biotech | 300230           | E229-10    |
| 3                        | Enzyme/Reaction Mix | AIT biotech | 300230           | E229-10    |
| 4                        | Positive Control    | AIT biotech | 300230           | E229-10    |
| Number of reaction tubes |                     | 24          |                  |            |

| SN    | RXN components      | Stock Concentration | Final concentration | Volumes/ tube (µl) | Final volume (µl) |
|-------|---------------------|---------------------|---------------------|--------------------|-------------------|
| 1     | Primer/Probe Mix    | NA                  | NA                  | 2                  | 48                |
| 2     | Enzyme/Reaction Mix | NA                  | NA                  | 6                  | 144               |
| 15    | Water Nuclease free | NA                  | NA                  | 12                 | 288               |
| 16    | DNA Template        |                     |                     | 5                  |                   |
| Total |                     |                     |                     | 25                 | 480               |

Aliquot 20µl of master mix in each 23 Tubes: 21 Samples + 1 Positive Controls + 1 No template control (NTC)

3. Name of Rotor Gene Q: Rotatory ramp, Convexional Heating

4. Programme Condition:

| Temp (°C) | Time | Cycles | Optics |
|-----------|------|--------|--------|
| 95        | 2    | min    | 1      |
| 95        | 5    | sec    | 45     |
| 60        | 20   | sec    | On     |

5. qPCR Analysis:

Location of the Folder on Computer: D:\Molecular Lab\Google\_drive\qPCR\  
Name of the RGQ file: Q199\_Malaria\_qPCR\_V1 2018-07-26

| Tube No | Sample code          | ct VALUE           |                  |               |               |                         | PCR RESULT | Malaria Species |
|---------|----------------------|--------------------|------------------|---------------|---------------|-------------------------|------------|-----------------|
|         |                      | FAM (P.falciparum) | HEX (P.malariae) | ROX (P.vivax) | Cy5 (P.ovale) | Quasar 705 (P.knowlesi) |            |                 |
| 1       | All Positive Control | 28.01              | 29.09            | 24.69         | 28.85         | 24.71                   | POSITIVE   | Pos control     |
| 2       | No template Control  |                    |                  |               |               |                         | NEGATIVE   |                 |
| 3       | MP135                |                    |                  |               |               |                         | NEGATIVE   |                 |
| 4       | MP136                |                    |                  |               |               |                         | NEGATIVE   |                 |
| 5       | MP137                |                    |                  |               |               |                         | NEGATIVE   |                 |
| 6       | MP138                |                    |                  |               |               |                         | NEGATIVE   |                 |
| 7       | MP139                |                    |                  |               |               |                         | NEGATIVE   |                 |
| 8       | MP140                |                    |                  |               |               |                         | NEGATIVE   |                 |
| 9       | MP141                |                    |                  |               |               |                         | NEGATIVE   |                 |
| 10      | MP142                |                    |                  | 37.81         |               |                         | POSITIVE   | P.vivax         |
| 11      | MP143                |                    |                  |               |               |                         | NEGATIVE   |                 |
| 12      | MP144                |                    |                  |               |               |                         | NEGATIVE   |                 |
| 13      | MP145                |                    |                  | 20.71         |               |                         | POSITIVE   | P.vivax         |
| 14      | MP146                |                    |                  | 15.24         |               |                         | POSITIVE   | P.vivax         |
| 15      | MP147                |                    |                  | 32            |               |                         | POSITIVE   | P.vivax         |
| 16      | MP148                |                    |                  | 30.53         |               |                         | POSITIVE   | P.vivax         |
| 17      | MP149                |                    |                  |               |               |                         | NEGATIVE   |                 |
| 18      | MP150                |                    |                  | 32.56         |               |                         | POSITIVE   | P.vivax         |
| 19      | MP151                |                    |                  | 34.91         |               |                         | POSITIVE   | P.vivax         |
| 20      | MP152                |                    |                  |               |               |                         | NEGATIVE   |                 |
| 21      | MPC1                 |                    |                  |               |               |                         | NEGATIVE   |                 |
| 22      | MPC2                 |                    |                  |               |               |                         | NEGATIVE   |                 |
| 23      | MPC3                 |                    |                  |               |               |                         | NEGATIVE   |                 |

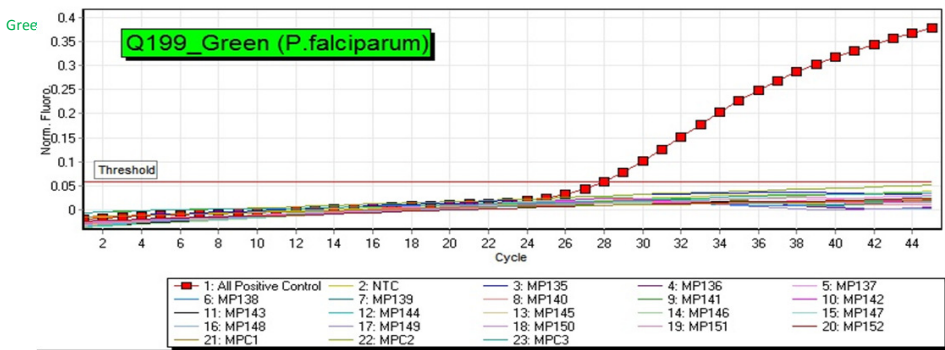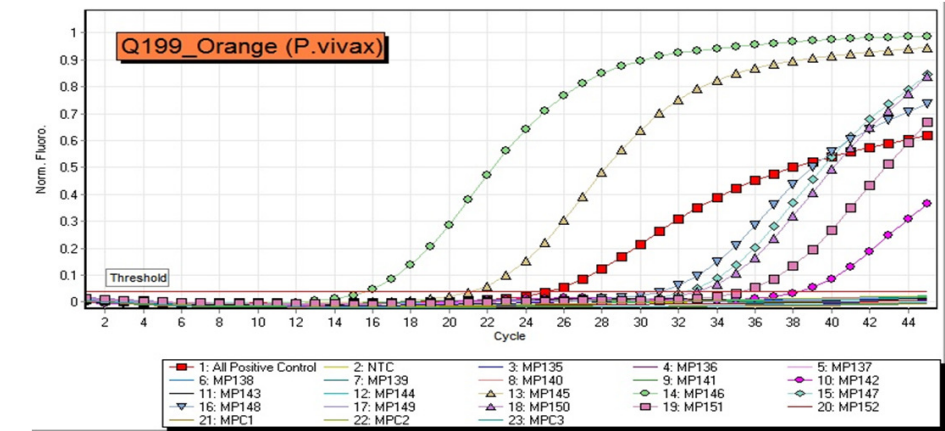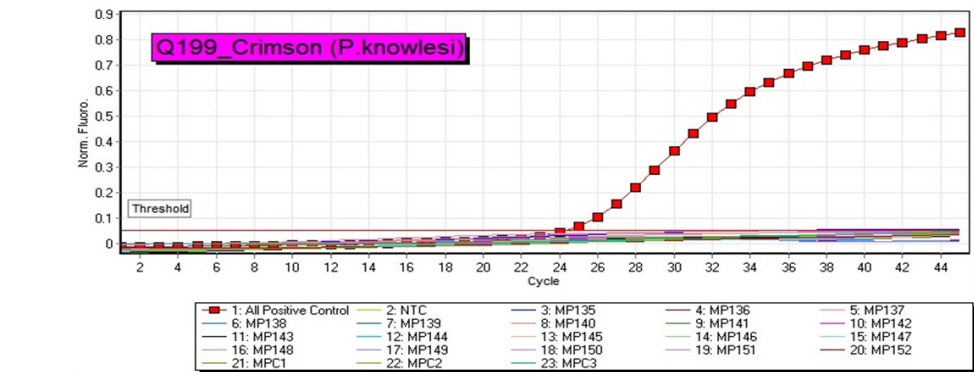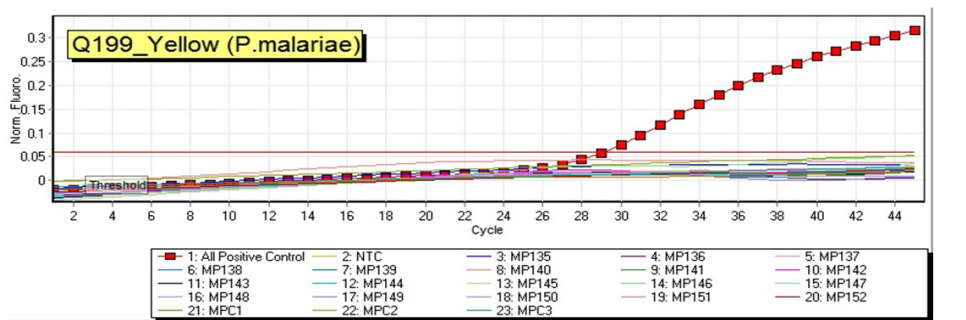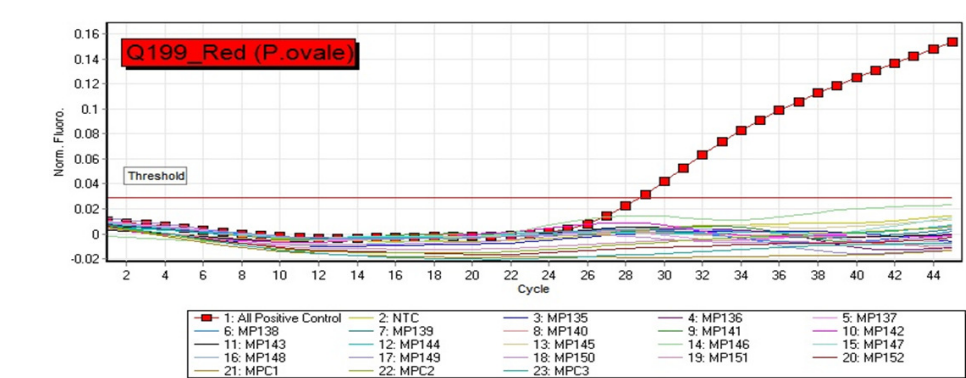

Supplement: f1 [file 3811318.f1.zip]
