# Supplementary material for: Challenges in Laboratory Diagnosis of Malaria in a Low-Resource Country at Tertiary Care in Eastern Nepal: A Comparative Study of Conventional vs. Molecular Methodologies
Source: Hindawi journal article supplement (doi:10.1155/2021/3811318), 2021-12-28

Molecular Biology Laboratory

BP Koirala Institute of Health Science

RGQ Machine No: RGQ\_02

qPCR Experiment No: Q198

Date: 26/07/2018

PCR Name: Malaria 5 qPCR

SOP No. MLR\_BP\_0062\_1.1

1. To perform the Malaria multiplex PCR of clinical sample

2. Required Material

| SN                       | Chemical /Reagents  | Brand       | Catalogue Number | Lot Number |
|--------------------------|---------------------|-------------|------------------|------------|
| 1                        | PCR grade water     | Himedia     | ML024            | 0000117943 |
| 2                        | Primer/Probe Mix    | AiT biotech | 300230           | E229-10    |
| 3                        | Enzyme/Reaction Mix | AiT biotech | 300230           | E229-10    |
| 4                        | Positive Control    | AiT biotech | 300230           | E229-10    |
| Number of reaction tubes |                     | 37          |                  |            |

| SN    | RXN components      | Stock Concentration | Final concentration | Volumes/ tube (µl) | Final volume (µl) |
|-------|---------------------|---------------------|---------------------|--------------------|-------------------|
| 1     | Primer/Probe Mix    | NA                  | NA                  | 2                  | 74                |
| 2     | Enzyme/Reaction Mix | NA                  | NA                  | 6                  | 222               |
| 3     | Water/Nuclease free | NA                  | NA                  | 12                 | 444               |
| 4     | DNA Template        |                     |                     | 5                  |                   |
| Total |                     |                     |                     | 25                 | 740               |

Aliquot 25µl of master mix in each 36 Tubes: 34 Samples + 1 Positive Controls + 1 No template control (NTC)

3. Name of Reagents: D. Biological ramp, Conventional, Real-time

4. Diagrammatic Condition

| Temp (°C) | Time   | Cycles | Optics |
|-----------|--------|--------|--------|
| 95        | 2 min  | 1      | Off    |
| 95        | 5 sec  | 45     | Off    |
| 60        | 20 sec |        | On     |

5. qPCR Analysis

Location of the Folder on Computer:

D:\Molecular Lab\Google\_drive\qPCR\

Q198\_Malaria\_qPCR\_V1 2018-07-26

| Tube No | Sample code          | Ct VALUE           |                  |               |               |                         | PCR RESULT | Malaria Species |
|---------|----------------------|--------------------|------------------|---------------|---------------|-------------------------|------------|-----------------|
|         |                      | FAM (P.falciparum) | HEX (P.malariae) | ROX (P.vivax) | Cy5 (P.ovale) | Quasar 705 (P.knowlesi) |            |                 |
| 1       | All Positive Control | 28.88              | 30.03            | 30.57         | 29.96         | 28.11                   | POSITIVE   |                 |
| 2       | No template Control  |                    |                  |               |               |                         | NEGATIVE   |                 |
| 3       | MP101                |                    |                  |               |               |                         | NEGATIVE   |                 |
| 4       | MP102                |                    |                  |               |               |                         | NEGATIVE   |                 |
| 5       | MP103                |                    |                  |               |               |                         | NEGATIVE   |                 |
| 6       | MP104                |                    |                  |               |               |                         | NEGATIVE   |                 |
| 7       | MP105                |                    |                  |               |               |                         | NEGATIVE   |                 |
| 8       | MP106                |                    |                  |               |               |                         | NEGATIVE   |                 |
| 9       | MP107                |                    |                  |               |               |                         | NEGATIVE   |                 |
| 10      | MP108                |                    |                  |               |               |                         | NEGATIVE   |                 |
| 11      | MP109                |                    |                  |               |               |                         | NEGATIVE   |                 |
| 12      | MP110                |                    |                  |               |               |                         | NEGATIVE   |                 |
| 13      | MP111                |                    |                  |               |               |                         | NEGATIVE   |                 |
| 14      | MP112                |                    |                  |               |               |                         | NEGATIVE   |                 |
| 15      | MP113                |                    |                  |               |               |                         | NEGATIVE   |                 |
| 16      | MP114                |                    |                  |               |               |                         | NEGATIVE   |                 |
| 17      | MP115                |                    |                  |               |               |                         | NEGATIVE   |                 |
| 18      | MP116                |                    |                  |               |               |                         | NEGATIVE   |                 |
| 19      | MP117                |                    |                  |               |               |                         | NEGATIVE   |                 |
| 20      | MP118                |                    |                  |               |               |                         | NEGATIVE   |                 |
| 21      | MP119                |                    |                  |               |               |                         | NEGATIVE   |                 |
| 22      | MP120                |                    |                  |               |               |                         | NEGATIVE   |                 |
| 23      | MP121                |                    |                  |               |               |                         | NEGATIVE   |                 |
| 24      | MP122                |                    |                  |               |               |                         | NEGATIVE   |                 |
| 25      | MP123                |                    |                  |               |               |                         | NEGATIVE   |                 |
| 26      | MP124                |                    |                  |               |               |                         | NEGATIVE   |                 |
| 27      | MP125                | 19.76              |                  |               |               |                         | POSITIVE   | P.falciparum    |
| 28      | MP126                | 38.86              |                  |               |               |                         | POSITIVE   | P.falciparum    |
| 29      | MP127                |                    |                  |               |               |                         | POSITIVE   | P.falciparum    |
| 30      | MP128                | 37.31              |                  |               |               |                         | POSITIVE   | P.falciparum    |
| 31      | MP129                | 37.27              |                  |               |               |                         | POSITIVE   | P.falciparum    |
| 32      | MP130                | 36.19              |                  |               |               |                         | POSITIVE   | P.falciparum    |
| 33      | MP131                |                    |                  |               |               |                         | NEGATIVE   |                 |
| 34      | MP132                | 37.36              |                  |               |               |                         | POSITIVE   | P.falciparum    |
| 35      | MP133                |                    |                  |               |               |                         | NEGATIVE   |                 |
| 36      | MP134                | 22.94              |                  |               |               |                         | POSITIVE   | P.falciparum    |

Green Channel

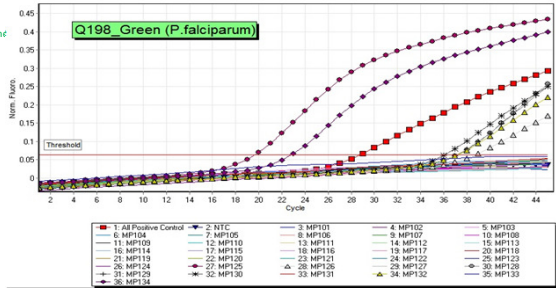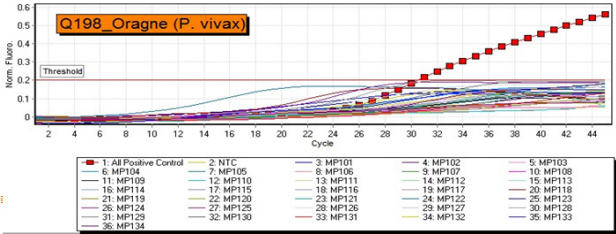

Orange

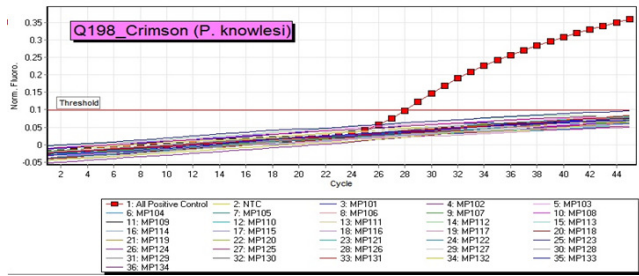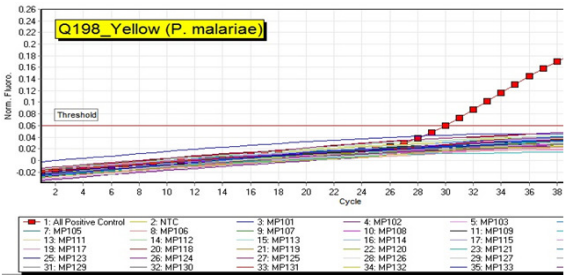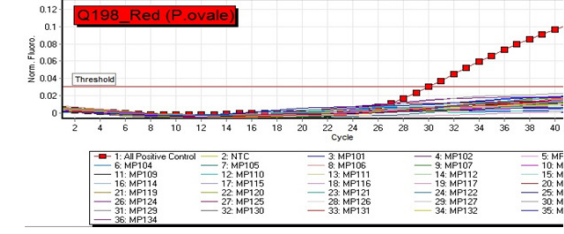

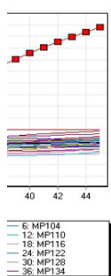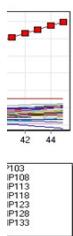

Supplement: f1 [file 3811318.f1.zip]
