# Supplementary material for: Challenges in Laboratory Diagnosis of Malaria in a Low-Resource Country at Tertiary Care in Eastern Nepal: A Comparative Study of Conventional vs. Molecular Methodologies
Source: J Trop Med. 2021 Dec 28;2021:3811318. doi: 10.1155/2021/3811318 (PMC8727160; doi:10.1155/2021/3811318)
Supplement: Supplementary Materials — The first-uploaded (20180726_qPCR_Experiment No Q199.pdf) and second-uploaded supplementary files (20180726_qPCR_Experiment No Q198.pdf) were the sheets generated by Rotor-Gene Q PCR machine that shows various chemical reagents used in our PCR experiments, PCR master mix components with their final volumes, thermocycling conditions (temperature, time, cycles, and optics), and real-time PCR graphical analysis for the detection of all five Plasmodium species along with their positive and negative controls. The two detected Plasmodium species in the whole blood samples (Plasmodium falciparum and Plasmodium vivax) amplified by real-time PCR were represented along with their Ct values. [file 3811318.f1.zip]

Archive with 2 entries (2 files):
- 3811318.f1/20180726_qPCR_Experiment No Q198.pdf
- 3811318.f1/20180726_qPCR_Experiment No Q199.pdf
